# Supplementary material
Source: publisher figshare collection journal article supplement (https://acs.figshare.com/ndownloader/files/3963853)
Supplement: Supplementary file 1 [file 3963853]

## Supporting Information

### Electron Paramagnetic Resonance Investigation of Charge Transfer in $\text{TiO}_2(\text{B})/\text{Anatase}$ and $\text{N-TiO}_2(\text{B})/\text{Anatase}$ Mixed-Phase Nanowires: The Relative Valence and Conduction Band Edges in the Two Phases

Hsin-Hsi Lo,<sup>†</sup> Neeruganti O. Gopal,<sup>†#</sup> Shiann-Cherng Sheu,<sup>‡</sup> and Shyue-Chu Ke\*,<sup>†</sup>

<sup>†</sup>Physics Department, National Dong Hwa University, Hualien, Taiwan 97401

<sup>‡</sup>Department of Occupational Safety and Health, Chang Jung Christian University, Tainan, Taiwan 711

E-mail: ke@mail.ndhu.edu.tw

## Supporting Figures

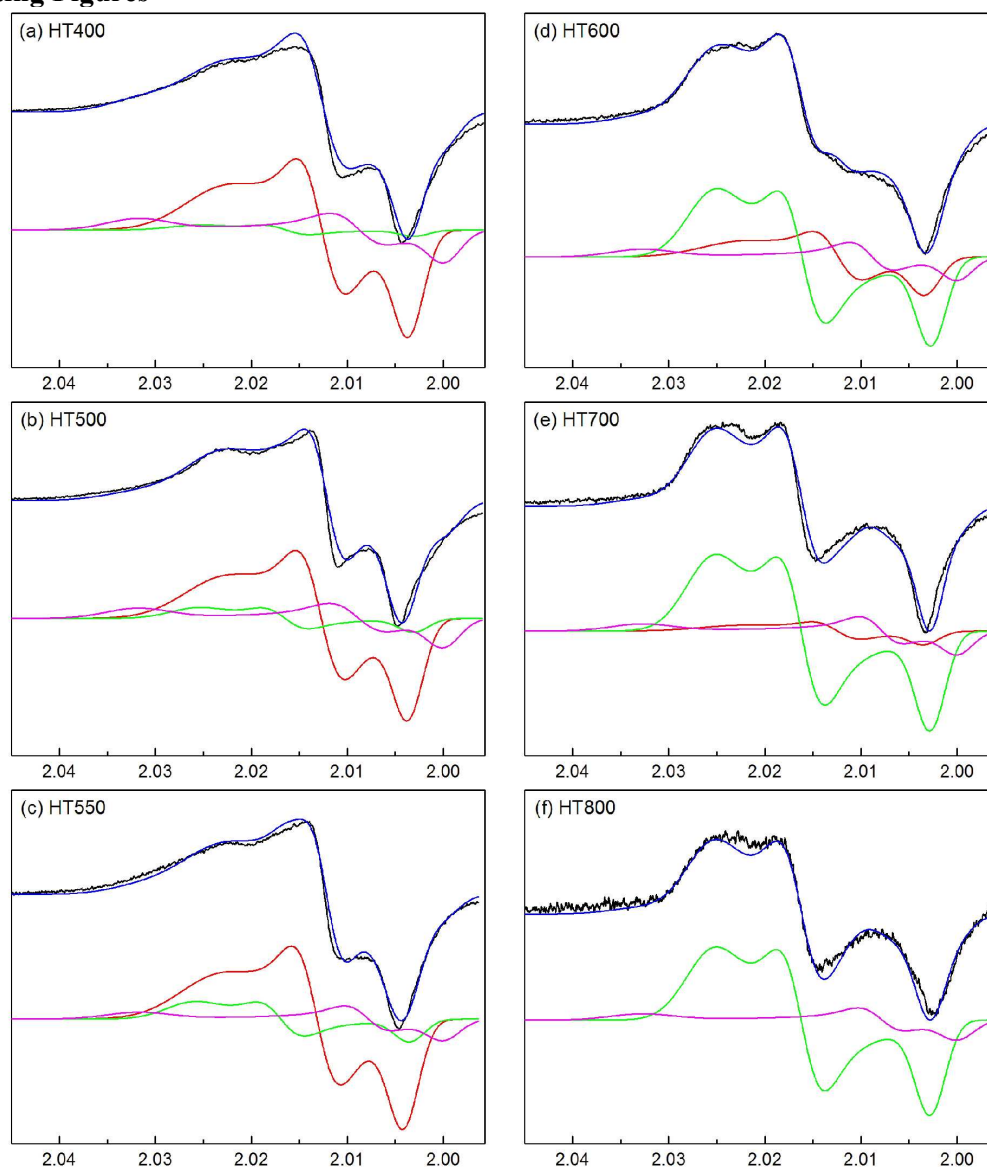

Figure S1. Deconvolutions of EPR experimental spectra (black) at  $g > 1.995$  into three components: Signal B (red), Signal C (green), Signal D (magenta). Weighted sum (blue) of signals B, C, and D.

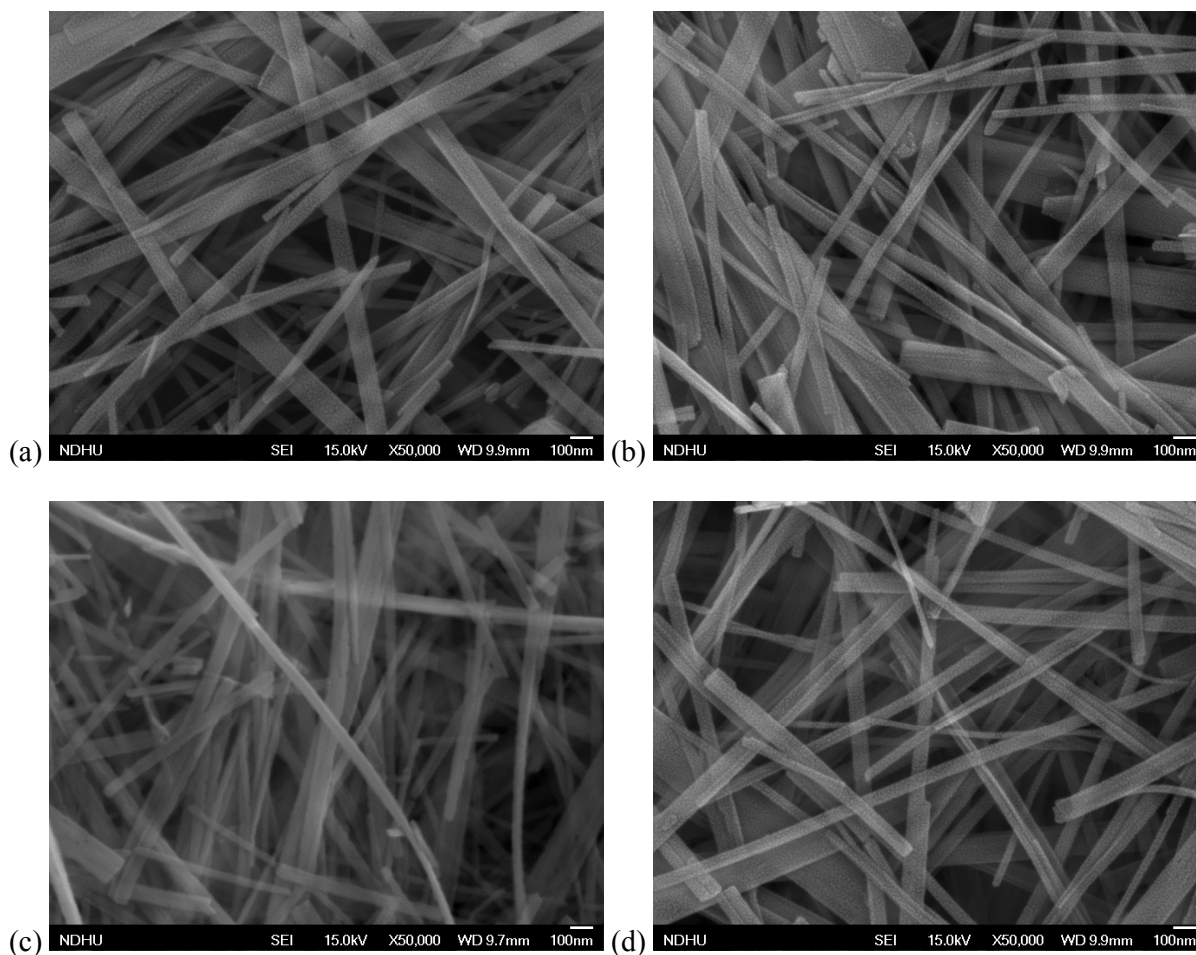

Figure S2. Field emission scanning electron microscopy images of nitrogen doped (a) NHT-NW, (b) NHT400, (c) NHT500 and (d) NHT550.

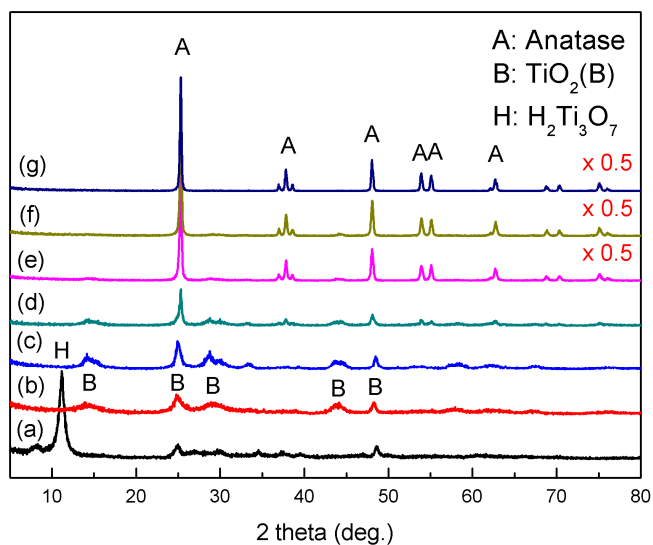

Figure S3. XRD patterns of (a) NHT-NW, (b) NHT400, (c) NHT500, (d) NHT550, (e) NHT600, (f) NHT700, and (g) NHT800.
